# Supplementary material for: Colorimetric Kit for Rapid Porcine Circovirus 2 (PCV-2) Diagnosis
Source: MDPI journal article supplement (doi:10.3390/pathogens11050570), 2022-05-12
Supplement: s1 [file s1]

## Support Information

### Colorimetric Kit for Rapid Porcine Circovirus 2 (PCV-2) Diagnosis

Caroline Rodrigues Basso<sup>1</sup>; Ana Carolina Yamakawa<sup>1</sup>; Taís Fukuta Cruz<sup>1,2</sup>; Valber Albuquerque Pedrosa<sup>2</sup>; Massimiliano Magro<sup>3</sup>; Fabio Vianello<sup>3</sup> João Pessoa Araújo Júnior<sup>1,2</sup>.

<sup>1</sup> *Biotechnology Institute, São Paulo State University- Botucatu, SP 18607-440, Brazil.*

<sup>2</sup> *Chemical and Biological Sciences Department, Bioscience Institute, São Paulo State University- Botucatu, SP 18618-000, Brazil.*

<sup>3</sup> *Comparative Biomedicine and Food Science Department, University of Padua, 35020 Legnaro, Italy.*

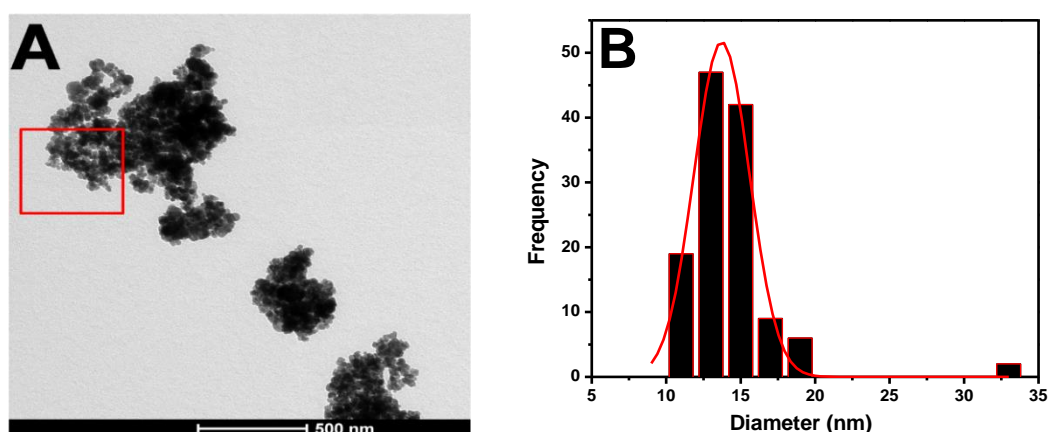

**Figure S1.** Surface active maghemite nanoparticles' (SAMN) featuring. **(A)** Transmission electron microscopy (TEM) image; and **(B)** histogram showing mean nanoparticle diameter of 13.72 nm.

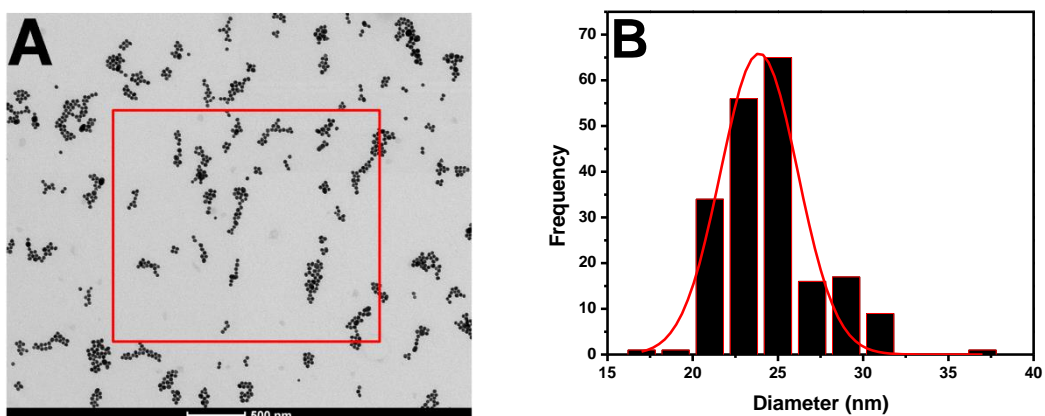

**Figure S2.** Gold nanoparticles' (AuNPs) featuring. **(A)** Transmission electron microscopy image; and **(B)** histogram showing mean nanoparticle diameter.

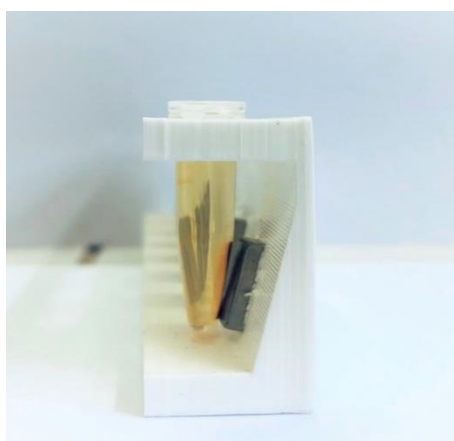

**Figure S3.** SAMN retrieved from water suspension upon exposure to external magnet.

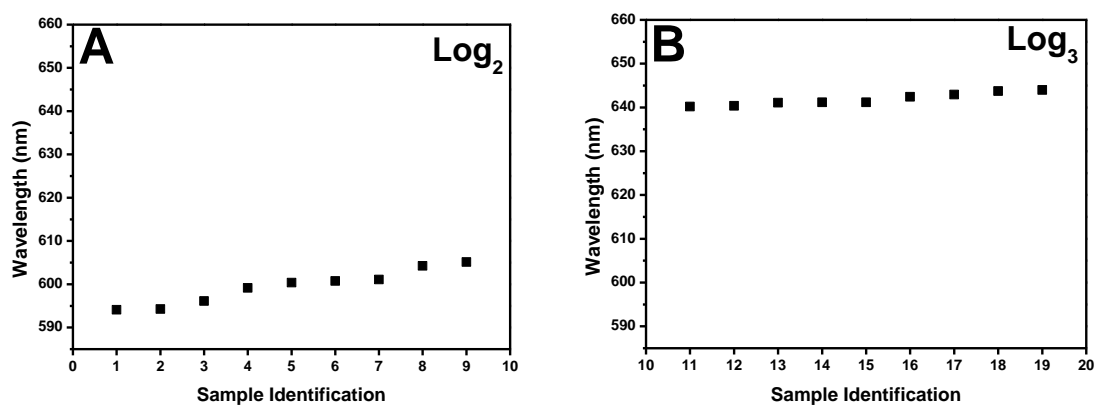

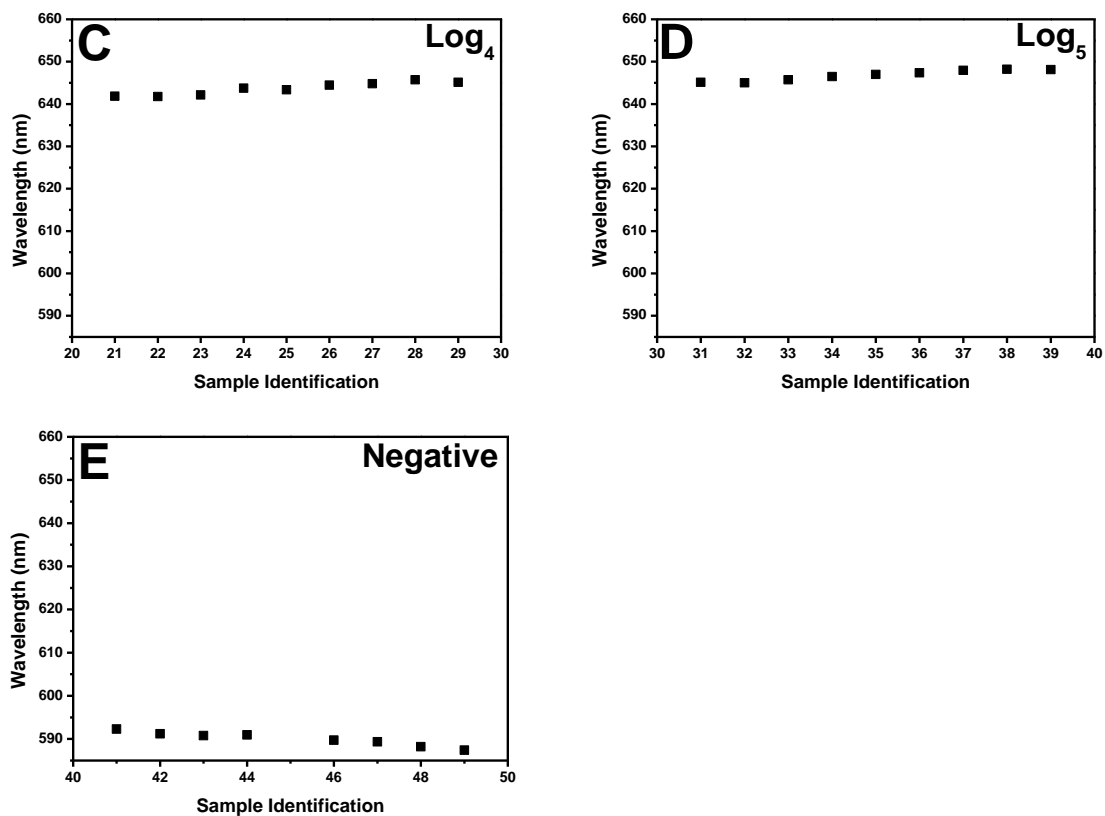

**Figure S4:** Spectrophotometer graphs showing the wavelengths of different viral load of samples tested. (A) samples with viral load of log<sub>2</sub>, (B) samples with viral load of log<sub>3</sub>, (C) samples with viral load of log<sub>4</sub>, (D) samples with viral load of log<sub>5</sub> and (E) negative samples.

**Table S1:** pH values for positive samples.

| Sample Identification | Log <sub>10</sub> (copies/μL) | pH  |
|-----------------------|-------------------------------|-----|
| SO10754               | 2.41                          | 5.1 |
| SO10765               | 2.62                          | 5.0 |
| SO11948               | 2.71                          | 5.5 |
| SO12166               | 2.63                          | 5.0 |
| SO12178               | 2.01                          | 5.0 |
| SO12669               | 2.57                          | 5.0 |
| SO12670               | 2.87                          | 5.4 |
| SO2G3                 | 2.39                          | 5.5 |
| SO3G3                 | 2.41                          | 5.5 |
| SO6G3                 | 2.97                          | 5.4 |
| SO8783                | 3.02                          | 5.5 |
| SO8786                | 3.71                          | 5.0 |
| SO8791                | 3.42                          | 5.0 |
| SO8808                | 3.62                          | 5.7 |

|          |      |     |
|----------|------|-----|
| SO10767  | 3.56 | 5.5 |
| SO10768  | 3.02 | 5.3 |
| SO10774  | 3.72 | 5.1 |
| SO10779  | 3.84 | 5.0 |
| SO10782  | 3.20 | 5.0 |
| SO 12659 | 3.15 | 5.0 |
| SO8777   | 4.18 | 5.1 |
| SO8797   | 4.41 | 5.0 |
| SO8798   | 4.68 | 5.7 |
| SO8803   | 4.49 | 5.5 |
| SO8810   | 4.82 | 5.5 |
| SO8819   | 4.00 | 5.5 |
| SO8823   | 4.73 | 5.1 |
| SO11974  | 4.94 | 5.7 |
| SO5G1    | 4.80 | 5.5 |
| SO7G1    | 4.19 | 5.5 |
| SO8787   | 5.91 | 5.5 |
| SO8790   | 5.27 | 5.2 |
| SO8788   | 5.38 | 5.0 |
| SO8799   | 5.10 | 5.0 |
| SO8800   | 5.17 | 5.0 |
| SO8802   | 5.57 | 5.5 |
| SO8820   | 5.05 | 5.5 |
| SO8795   | 5.95 | 5.7 |
| SO12468  | 5.09 | 5.0 |
| SO12479  | 5.05 | 5.0 |

**Table S2:** pH values for negative samples.

| <b>Samples Identification</b> | <b>Log<sub>10</sub> (copies/μL)</b> | <b>pH</b> |
|-------------------------------|-------------------------------------|-----------|
| SO12671                       | 0                                   | 5.0       |
| SO12673                       | 0                                   | 5.0       |
| SO12674                       | 0                                   | 5.0       |
| SO12680                       | 0                                   | 5.5       |
| SO12681                       | 0                                   | 5.0       |
| SO12683                       | 0                                   | 5.0       |
| SO12686                       | 0                                   | 5.5       |
| SO12687                       | 0                                   | 5.5       |
| SO12688                       | 0                                   | 5.5       |
| SO12689                       | 0                                   | 5.3       |
